# Supplementary material
Source: PubMed Central journal article supplement (PMC3186375)
Supplement: supp_M111.259507_jbc.M111.259507-1.pdf [file supp_M111.259507_jbc.M111.259507-1.pdf]

## **Supplemental Material**

### **DI/S5-SS1**

DmNa<sub>v</sub>1: *MGVLTQKCIKKFPLDGSWGNLTDE-----NWDYHNRNSSNWYSEDEG*

rNa<sub>v</sub>1.2a: MGNLRNKCLQWPPDNSTFEINITSFNNSLDWNGTAFNRTVNMFNWDEYIEDKSHFYFLEGQ

DmNa<sub>v</sub>1: *ISFPLCGNISGAGQCDDDYVCLQGFGPNPNYGYTSFDSF*

rNa<sub>v</sub>1.2a: NDALLCGNSSDAGQCPEGYICVKA-GRNPNYGYTSFDTF

### **DI/SS2-S6**

DmNa<sub>v</sub>1: VLRAAGPWH

rNa<sub>v</sub>1.2a: TLRAAGKTY

### **DIV/S1-S2**

DmNa<sub>v</sub>1: *MTLDRYDASDTYNAVLDY*

rNa<sub>v</sub>1.2a: *MMVETDDQSQEMTNILYW*

### **DIV/S3-S4**

DmNa<sub>v</sub>1: *LGLVLSDIIEKYFVSPTLLRVVR*

rNa<sub>v</sub>1.2a: *VGMFLAELIEKYFVSPTLFRVIR*

SUPPLEMENTAL FIGURE 1: Sequence alignment of extracellular loops (in italics) of the Pore-module of DI and Gating-module of DIV of DmNa<sub>v</sub>1 and Na<sub>v</sub>1.2a. Sequences used in the swap experiments are underlined.

**SUPPLEMENTAL TABLE 1: Biophysical properties of channel chimeras.** Voltage dependence of activation was measured by fitting the GV curve with one component Boltzmann distribution (see Methods), yielding half-maximal activation ( $V_{1/2}$ ) and the slope factor ( $k_{1/2}$ ). Steady-state inactivation was measured as depicted in the Methods, with  $V_h$  representing the membrane potential at which half-maximal inactivation was achieved;  $k_h$  is the slope factor.  $n$  for all experiments is at least 6.

| Channel                                                                  | Activation     |           | Steady-state inactivation |         |
|--------------------------------------------------------------------------|----------------|-----------|---------------------------|---------|
|                                                                          | $V_{1/2}$ , mV | $k_{1/2}$ | $V_h$ , mV                | $k_h$   |
| DmNa <sub>v</sub> 1 unmodified                                           | -23.2±1.4      | 5.3±0.1   | -48.9±1.1                 | 5.2±0.1 |
| DmNa <sub>v</sub> 1 <sup>rNa<sub>v</sub>1.2a(DIV/S1-S2)</sup>            | -20.7±1.1      | 5.0±0.3   | -45.2±0.9                 | 5.5±0.1 |
| DmNa <sub>v</sub> 1 <sup>rNa<sub>v</sub>1.2a(DIV/S1-S2 + S3-S4)</sup>    | -27.5±2        | 4.5±0.5   | -43.8±1.2                 | 5.4±0.1 |
| DmNa <sub>v</sub> 1 <sup>rNa<sub>v</sub>1.2a (DIV/S3-MFLA)</sup>         | -24.5±3        | 4.8±0.4   | -42.1±1                   | 5.1±0.2 |
| DmNa <sub>v</sub> 1 <sup>rNa<sub>v</sub>1.2a(DI/SS2-S6)</sup>            | -22.0±1.7      | 5.5±0.5   | -46.0±1.2                 | 5.4±0.1 |
| DmNa <sub>v</sub> 1 <sup>rNa<sub>v</sub>1.2a(D1/S5-SS1 + SS2-S6)</sup>   | -21.1±1        | 4.6±0.4   | -43.7±1.2                 | 4.8±0.2 |
| DmNa <sub>v</sub> 1 <sup>rNa<sub>v</sub>1.2a (site-3 face)</sup>         | -25.8±2.2      | 4.5±0.2   | -46.0±1.8                 | 5.4±0.1 |
| DmNa <sub>v</sub> 1 <sup>rNa<sub>v</sub>1.2a(Site-3 face + E1613D)</sup> | -21.9±0.8      | 4.8±0.2   | -40.7±1.3                 | 5.4±0.1 |
| rNa <sub>v</sub> 1.2a unmodified                                         | -25±1.6        | 4.2±0.2   | -43.9±0.8                 | 6.4±0.1 |
| rNa <sub>v</sub> 1.2a <sup>E1613D</sup>                                  | -25.3±1.8      | 4.13±0.3  | -43.6±0.7                 | 6.8±0.2 |
